# Supplementary material for: De novo mutations in SOD1 are a cause of ALS
Source: PubMed Central journal article supplement (PMC8784989; doi:10.1136/jnnp-2021-327520), 2021-09-13
Supplement: jnnp-2021-327520supp001.pdf [file jnnp-2021-327520supp001.pdf]

Supplementary Table 1: Demographics and clinical overview of the participants

|                                                                                                                                      | PATIENT                                                                                                                                                              |                                                                                                                                                            |                                                |                                                                                                                                      |                                                                                              |
|--------------------------------------------------------------------------------------------------------------------------------------|----------------------------------------------------------------------------------------------------------------------------------------------------------------------|------------------------------------------------------------------------------------------------------------------------------------------------------------|------------------------------------------------|--------------------------------------------------------------------------------------------------------------------------------------|----------------------------------------------------------------------------------------------|
|                                                                                                                                      | A                                                                                                                                                                    | B                                                                                                                                                          | C                                              | D                                                                                                                                    | E                                                                                            |
| Origin                                                                                                                               | Germany                                                                                                                                                              | Korea                                                                                                                                                      | Sweden                                         | Kurdistan                                                                                                                            | Sweden                                                                                       |
| Mutation                                                                                                                             | p.(Gly38Arg)<br>c.112G>C<br>GGA>CGA                                                                                                                                  | p.(Ala90Thr)<br>c.268G>A<br>GCT>ACT                                                                                                                        | p.Asp91Val<br>c.272A>T<br>GAC>GTC              | p.(Asp102Asn)<br>c.304G>A<br>GAT>AAT                                                                                                 | p.Asp102Gly<br>c.305A>G<br>GAT>GGT                                                           |
| Mutation history report                                                                                                              | Novel: A c.112G>A also resulting in p.G38R has been reported in fALS in Germany, Spain, Taiwan, Turkey, USA (ref. 2). Also expressed in tg mouse MND-model (ref. 14) | USA fALS of hispanic descent (ref. 16)                                                                                                                     | One small fALS in Japan (ref. 17)              | Reported in a single sALS in the UK of Pakistani origin and 15 fALS cases in Belarus and Scotland (ref. 18, 19, 20)                  | fALS in England, Ireland, U.S.A. (ref. 19, 33)                                               |
| "hot-spot" area of <i>SOD1</i> ?                                                                                                     | yes                                                                                                                                                                  | yes                                                                                                                                                        | yes                                            | yes                                                                                                                                  | yes                                                                                          |
| Charge change of mutant <i>SOD1</i> compared to wild-type <i>SOD1</i> (-6)                                                           | +1                                                                                                                                                                   | neutral                                                                                                                                                    | +1                                             | +1                                                                                                                                   | +1                                                                                           |
| Sex                                                                                                                                  | f                                                                                                                                                                    | f                                                                                                                                                          | f                                              | m                                                                                                                                    | m                                                                                            |
| Present age of parents or - if deceased - their age at death (the older they are => less likely they will get ALS after the proband) | alive late fifties                                                                                                                                                   | alive late sixties                                                                                                                                         | alive around 80 years of age                   | alive around 70 years of age                                                                                                         | father died at age 48 from aggressive ALS, autopsy confirmed. Mother alive over 80 years old |
| Family history                                                                                                                       | None for NMD. Both parents DM2                                                                                                                                       | None for ALS or FTD; father DM. Nephew with Myotonic dystrophy                                                                                             | None for NMD or FTD                            | None for NMD. both parents DM                                                                                                        | Father with autopsy-confirmed ALS. No other affected family members                          |
| Unaffected siblings?                                                                                                                 | 1 younger (not tested)                                                                                                                                               | 2 younger siblings (not tested)                                                                                                                            | 2 younger brothers, not mutation carriers      | 8 older siblings, none are mutation carriers                                                                                         | 1 sibling, not mutation carrier                                                              |
| Clinical diagnosis                                                                                                                   | sALS                                                                                                                                                                 | sALS                                                                                                                                                       | sALS                                           | sALS                                                                                                                                 | fALS                                                                                         |
| Age at onset of first paresis                                                                                                        | 22 years                                                                                                                                                             | 45 years                                                                                                                                                   | 42 years                                       | 30 years                                                                                                                             | 38 years                                                                                     |
| Site of first paresis                                                                                                                | leg                                                                                                                                                                  | right leg                                                                                                                                                  | left shoulder                                  | left arm and hand                                                                                                                    | gluteal muscles and leg                                                                      |
| Symptoms prior to onset of paresis                                                                                                   | troublesome muscle cramps appeared with the onset of paresis and have persisted ever since                                                                           | 4 years before onset of paresis, severe muscle cramps and a tingling sensation in the right leg. These symptoms disappeared a year before onset of paresis | preparietic pain syndrome in the shoulder area | preparietic neuralgic pain initially in the shoulder region, later a period of pain sensation preceding manifest paresis in the legs | None                                                                                         |
| UMN/LMN affection                                                                                                                    | both                                                                                                                                                                 | both                                                                                                                                                       | both                                           | predominantly LMN                                                                                                                    | predominantly LMN                                                                            |
| Survival time (paresis to death)                                                                                                     | alive > 97 months after onset                                                                                                                                        | alive > 41 months after onset                                                                                                                              | 50,3 months                                    | alive > 38 months                                                                                                                    | 27,5                                                                                         |
| Total lifespan                                                                                                                       | alive, > 31 years                                                                                                                                                    | alive, >49 years                                                                                                                                           | deceased at age 46 years                       | alive, > 33 years                                                                                                                    | 41,1                                                                                         |
| Other genes excluded                                                                                                                 | large panel of neuromuscular-genes                                                                                                                                   | NGS-WES; panel of ALS genes                                                                                                                                | ProjectMinE NGS-WGS; panel of ALS genes        | NGS-WES                                                                                                                              | panel of ALS genes                                                                           |
| Comments                                                                                                                             | No bulbar involvement. Participate in VALOR <i>tofersen</i> clinical drug trial                                                                                      | Edaravone treated                                                                                                                                          | Late bulbar involvement                        | On invasive ventilation 16 months after onset                                                                                        | Late bulbar involvement                                                                      |
| Disease rate                                                                                                                         | slow progression                                                                                                                                                     | slow progression                                                                                                                                           | moderate progression                           | rapid progression                                                                                                                    | moderate progression                                                                         |
| <i>SOD1</i> enzymatic activity in erythrocytes, U/mg Hb (normal 54,1±5,7, ref. 11)                                                   | 38,50                                                                                                                                                                | na                                                                                                                                                         | 35,61                                          | 34,73                                                                                                                                | 25,78                                                                                        |
| ACMG score (ref. 12)                                                                                                                 | PS1, PS2, PS4, PM1, PM2, PP3                                                                                                                                         | PS2, PM2, PS4, PP3                                                                                                                                         | PS2, PS4, PM2, PM5                             | PS2, PM1, PM2, PS4, PP3                                                                                                              | PS1, PS4, PM1, PM2, PP3                                                                      |

DM, diabetes mellitus type 2; LMN, lower motor neuron signs; MND, motor neuron disease; NGS, next generation DNA sequencing; NMD, neuromuscular disease; WGS, whole-genome sequencing; WES, whole-exome sequencing;
