# Supplementary material for: De novo mutations in SOD1 are a cause of ALS
Source: PubMed Central journal article supplement (PMC8784989; doi:10.1136/jnnp-2021-327520), 2021-09-13

## Supplement 1a:

DNA sequencing results for the German family: the patient is heterozygous for *SOD1*:c.112G>C, p.Gly38Arg but not the parents.

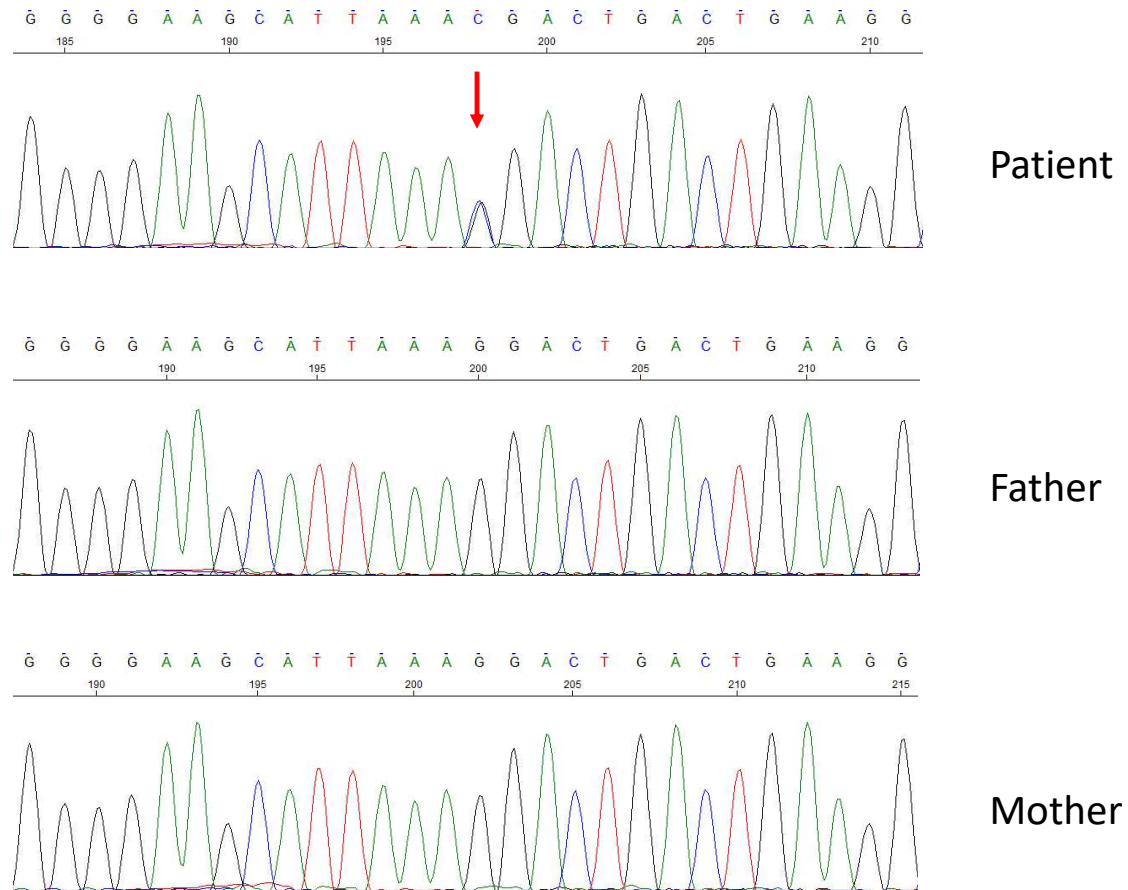



## Supplement 1c Swedish family

DNA sequencing results for the Swedish family: the patient is heterozygous for *SOD1*:c.272A>T, p.Asp91Val but not the parents.

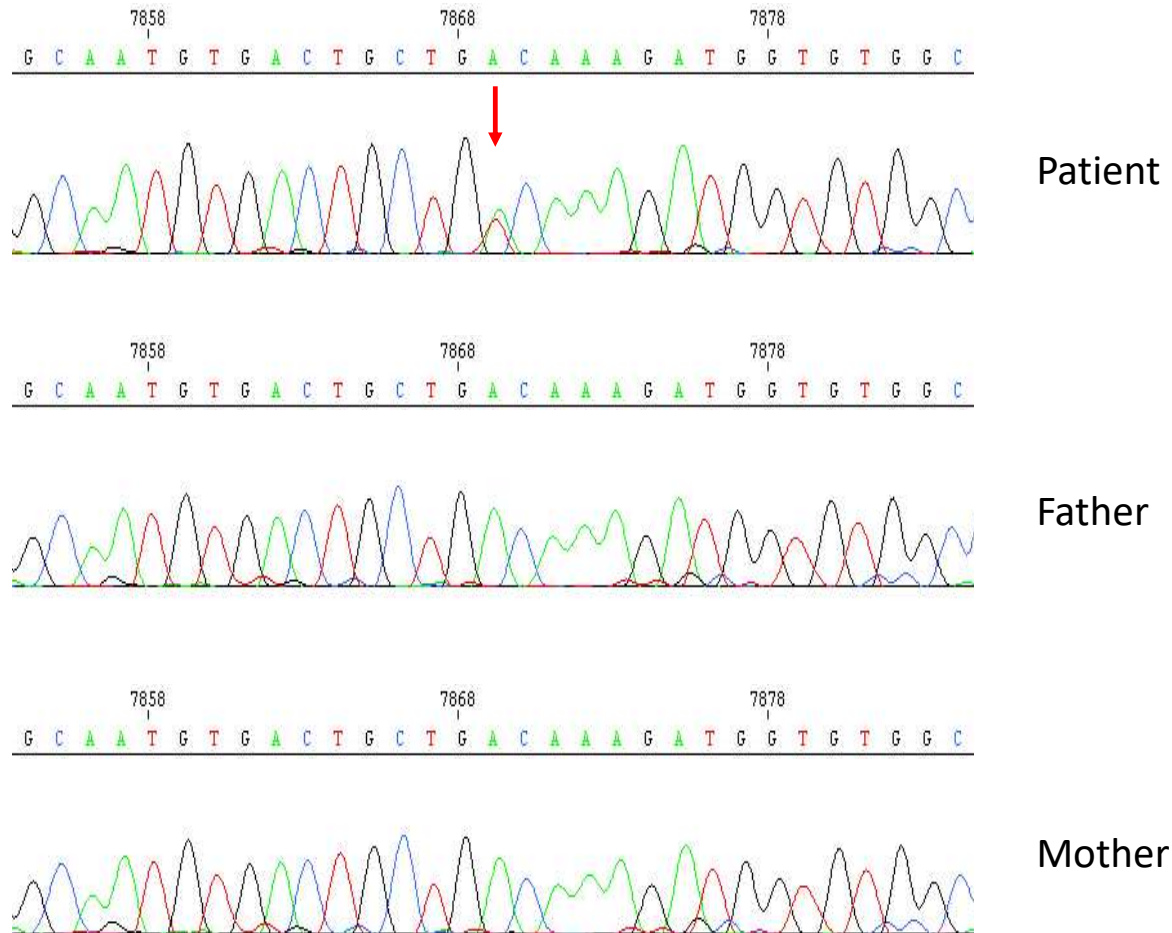

## Supplement 1d

DNA sequencing results for the Kurdish-Turkish family: the patient is heterozygous for *SOD1*:c.304G>A, p.Asp102Asn but not the parents.

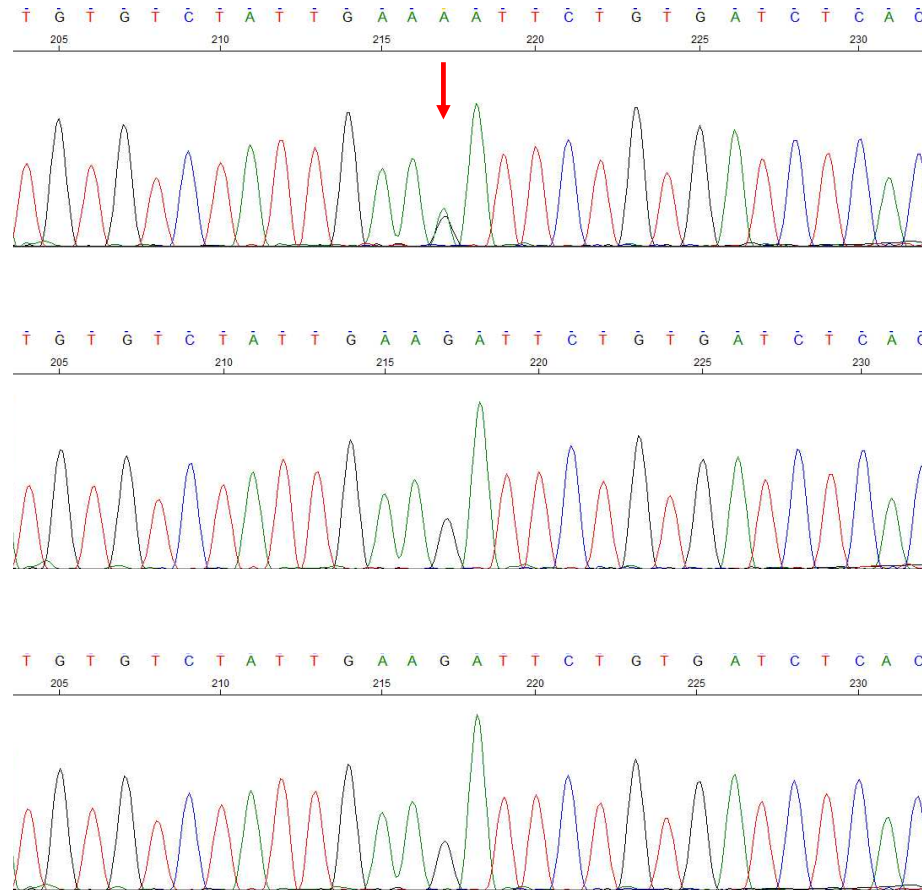

Supplement: jnnp-2021-327520supp002.pdf [file jnnp-2021-327520supp002.pdf]
